# Supplementary material
Source: publisher site journal article supplement (https://www.dovepress.com/article/556881)
Supplement: Supplementary file 1 [file 556881%20Revised%20Supplementary%20Material.docx]

**Supplementary Material 1: Round‑1 Structured Questionnaire.**

Note: This instrument was used in Round‑1 to capture national practice patterns and initial agreement ratings across seven domains. Items were rated on a three‑point scale (Agree / Neutral / Disagree). After Round‑1, some exploratory items were refined, merged, or removed prior to Round‑2 expert rating.

**Instructions to respondents (Round‑1)**

• Please indicate your agreement with each statement: Agree / Neutral / Disagree.

• You may add brief free‑text comments after any item to clarify your response or suggest rewording.

• Estimated completion time: 10–12 minutes. Responses are anonymous and analyzed in aggregate.

**Section A: Participant Information (abbreviated)**

• Years in clinical practice (≥5 years required); subspecialty; practice setting; region.

**Section B: Clinical Practice Patterns (abbreviated)**

• Typical diagnostic tools, first‑line therapies, use of adjuvants, procedural experience, transplant referrals.

**Section C: Statements for Agreement (final domains; rated again in Round‑2)**

1. [Diagnosis] Comprehensive medical history assessment is essential for all AGA patients.

2. [Diagnosis] Clinical scalp examination is usually sufficient for diagnosis.

3. [Diagnosis] Pull test and trichoscopy are useful tools to confirm diagnosis.

4. [Diagnosis] Basic investigations are reserved for patients whose history/examination suggests specific deficiencies or conditions.

5. [Minoxidil] Topical minoxidil: 1 mL twice daily.

6. [Minoxidil] Minoxidil 5% foam is more effective than 2% solution in female pattern hair loss (FPHL).

7. [Minoxidil] Higher concentrations of minoxidil >5% have a limited role.

8. [Minoxidil] Temporary shedding is expected at treatment initiation and should not prompt discontinuation.

9. [Minoxidil] Hypertrichosis is relatively common but is typically reversible within 1–6 months after discontinuation.

10. [Minoxidil] Patients can be considered non‑responders to minoxidil after six months of continuous use without observable improvement.

11. [Minoxidil] Oral minoxidil is an option for patients with non‑compliance or intolerance to topical application.

12. [Minoxidil] Intradermal minoxidil is an alternative for patients with poor compliance with daily topical application.

13. [Minoxidil] AGA is increasingly recognized in pediatric patients; topical minoxidil may be of therapeutic value.

14. [Antiandrogens] Oral finasteride 1 mg/day is an effective modality in males with AGA.

15. [Antiandrogens] Oral dutasteride 0.5 mg/day may be used as a line of therapy in male AGA patients.

16. [Antiandrogens] Androgen receptor antagonists can play a role in the management of FPHL, particularly in hyperandrogenic profiles.

17. [Low‑Level Laser Therapy] Low‑level laser therapy (LLLT) three times per week reduces vellus hairs and increases terminal hair counts and shaft diameter.

18. [Adjuvant Therapies] Non‑minoxidil topical therapies may have a beneficial role.

19. [Adjuvant Therapies] Natural oils may be considered in minoxidil non‑responders or those who refuse minoxidil therapy.

20. [Adjuvant Therapies] Ketoconazole 2% shampoo (2–3 times per week) can be employed as an adjuvant therapy in AGA.

21. [Adjuvant Therapies] Nutritional supplements (e.g., amino acids, biotin, zinc, vitamin D) may be useful in patients with concomitant AGA and telogen effluvium (TE).

22. [Adjuvant Therapies] Platelet‑rich plasma (PRP) can be given monthly for three sessions, then every 3–6 months for maintenance.

23. [Adjuvant Therapies] Bio‑injectables (e.g., stem cells, exosomes, growth factors) are promising but require further high‑quality evidence.

24. [Adjuvant Therapies] Microneedling enhances therapeutic response to topical treatment.

25. [Adjuvant Therapies] Combined therapies with topical minoxidil are recommended for suitable patients.

26. [Hair Transplantation] Hair transplantation is recommended if there is no stabilization or improvement after 12 months of continuous medical therapy.

27. [Counseling/Hair Aids] Counseling, wigs, hair extensions, and topical camouflage may be recommended in late‑stage patients or those declining medical/procedural therapies.

**Section D: Exploratory Items (Round‑1 only; removed/merged after refinement)**

These exploratory statements were tested in Round‑1 to probe areas of uncertainty or operational detail. Based on respondent feedback and item‑level distributions, they were refined, merged into broader statements, or removed prior to Round‑2 expert rating.

28. [Diagnosis] Universal laboratory screening (ferritin, vitamin D, TSH, vitamin B12, prolactin) should be undertaken in all suspected AGA cases irrespective of clinical suspicion.

**Disposition:** Refined to targeted testing based on history and examination (final Statement 4).

29. [Diagnosis] Trichoscopy should be mandated at baseline and repeated every 3–6 months for all AGA patients to document treatment response.

**Disposition:** Merged into optional complementary assessments with clinician discretion (final Statements 2–3).

30. [Minoxidil] Topical minoxidil concentrations greater than 5% (e.g., 7–10%) should be preferred as initial therapy in adults to accelerate response.

**Disposition:** Removed; evidence considered insufficient for routine preference (final Statement 7 emphasizes limited role of >5%).

31. [Minoxidil] Oral minoxidil can be considered a first‑line alternative to topical minoxidil for adults without cardiovascular comorbidity.

**Disposition:** Reworded; oral minoxidil reserved for topical non‑compliance or intolerance (final Statement 11).

32. [Antiandrogens] Topical finasteride should routinely replace oral finasteride in men to minimize systemic adverse effects.

**Disposition:** Merged; topical finasteride considered within combination/individualized therapy rather than routine replacement (final Statement 25).

33. [Low‑Level Laser Therapy] Daily home‑use low‑level laser therapy is superior to thrice‑weekly regimens and should be recommended when available.

**Disposition:** Removed; frequency standardized to three times per week based on practicality and evidence synthesis (final Statement 17).

34. [Adjuvant/Procedures] Microneedling at ≥1.5 mm depth performed weekly is superior to ≤1.0 mm depths and should be routinely combined with minoxidil.

**Disposition:** Refined to endorse microneedling as an adjunct without prescriptive depth/frequency (final Statement 24).

35. [Hair Transplant/Counseling] Patients with Norwood II hair loss should be considered for early hair transplantation after 6 months of medical therapy if psychosocial distress is present.

**Disposition:** Refined to a more conservative threshold and timing for transplantation (final Statement 26).

Consensus definition for Round‑2: Items achieving ≥75% ‘Agree’ among experts were classified as consensus statements.

**Supplementary Table 1: Raw Counts of Round‑2 (20‑member expert panel).**

| Key Area | Statement # | Summary Statement | Agree (n) | Neutral (n) | Disagree (n) | Total (n) | Agreement (%) |
| --- | --- | --- | --- | --- | --- | --- | --- |
| Diagnosis | 1 | All patients with suspected AGA must undergo a comprehensive medical history assessment, encompassing the age of commencement of hair loss, family history; medical conditions such as metabolic syndrome and insulin resistance; use of anabolic substances including whey and isolate protein shakes; and smoking habits | 19 | 1 | 0 | 20 | 95 |
| 2 | Clinical examination of the scalp is typically sufficient for diagnosing AGA | 17 | 3 | 0 | 20 | 85 |
| 3 | Complementary assessments, including the pull test and trichoscopy, for evaluating the terminal-to-vellus hair ratio, are useful tools to confirm the diagnosis | 18 | 2 | 0 | 20 | 90 |
| 4 | Basic investigations can be reserved for patients whose history and examination findings suggest a specific disease or deficiency | 18 | 2 | 0 | 20 | 90 |
| Minoxidil | 5 | Topical minoxidil solution is administered in a dosage of 1 mL twice daily | 20 | 0 | 0 | 20 | 100 |
| 6 | Minoxidil 5% foam is more effective than 2% solution in female pattern hair loss | 18 | 2 | 0 | 20 | 90 |
| 7 | Higher concentrations of minoxidil >5% have a limited role in therapy | 17 | 3 | 0 | 20 | 85 |
| 8 | Patients on minoxidil should be warned of the possibility of an initial but temporary hair fall, which should not prompt discontinuation of treatment | 19 | 1 | 0 | 20 | 95 |
| 9 | Hypertrichosis is one of the most bothersome side effects of minoxidil but typically resolves within 1-6 months after drug discontinuation | 18 | 2 | 0 | 20 | 90 |
| 10 | Patients with AGA are considered non-responders to minoxidil after six months of continuous use without observable improvement | 18 | 2 | 0 | 20 | 90 |
| 11 | Oral minoxidil in doses starting from 0.25 mg daily is considered, especially for patients with topical minoxidil non-compliance | 17 | 3 | 0 | 20 | 85 |
| 12 | Intradermal minoxidil injection is an alternative for patients with poor compliance with daily topical application | 17 | 3 | 0 | 20 | 85 |
| 13 | AGA in children and adolescents is becoming a more evident phenomenon, and topical minoxidil may be of therapeutic value | 16 | 4 | 0 | 20 | 80 |
| Antiandrogens | 14 | Oral finasteride at a daily dosage of 1 mg is a potent modality in males with AGA | 19 | 1 | 0 | 20 | 95 |
| 15 | Oral dutasteride 0.5 mg/day may be used as a line of therapy in male AGA patients | 18 | 2 | 0 | 20 | 90 |
| 16 | Androgen receptor antagonists can play a role in the management of FPHL | 16 | 4 | 0 | 20 | 80 |
| Low‑Level Laser Therapy | 17 | Low-level laser therapy three times per week causes a decrease in the number of vellus hairs, an increase in terminal hair, and an increase in shaft diameter | 19 | 1 | 0 | 20 | 95 |
| Adjuvant Therapies | 18 | Non-minoxidil topical therapies may have a beneficial role | 15 | 5 | 0 | 20 | 75 |
| 19 | Natural oils may be considered in minoxidil non-responders or those who refuse minoxidil therapy | 16 | 4 | 0 | 20 | 80 |
| 20 | Ketoconazole 2% shampoo (2–3 times per week) can be employed as an adjuvant therapy in AGA due to its anti-inflammatory or anti-androgenic properties | 16 | 4 | 0 | 20 | 80 |
| 21 | Nutritional supplements, including amino acids, biotin, zinc, and other micronutrients, have a role as adjuvant therapy in managing AGA or patients who have simultaneous telogen effluvium and AGA | 15 | 5 | 0 | 20 | 75 |
| 22 | Platelet-rich plasma (PRP) sessions for AGA can be done monthly for 3 sessions, then a session every 3–6 months as a maintenance treatment | 18 | 2 | 0 | 20 | 90 |
| 23 | Bio-injectables are promising | 15 | 5 | 0 | 20 | 75 |
| 24 | Microneedling helps boost the therapeutic response to topical treatment | 18 | 2 | 0 | 20 | 90 |
| 25 | Combined therapies with topical minoxidil are recommended for AGA patients | 19 | 1 | 0 | 20 | 95 |
| Hair Transplantation | 26 | Hair transplantation is recommended if there is no perceptible improvement or stabilization after 12 months of continuous medical treatment | 19 | 1 | 0 | 20 | 95 |
| Counseling/Hair Aids | 27 | In patients with AGA, you may recommend counseling, non-medical aesthetic wigs, hair extensions, and topical powder makeup in late-stage patients or those who refuse any kind of treatment | 18 | 2 | 0 | 20 | 90 |
